# Supplementary material
Source: PubMed Central journal article supplement (PMC3536214)
Supplement: JCM.02466-12_zjm999092175so1.pdf [file JCM.02466-12_zjm999092175so1.pdf]

| Strain        | Biotype | 185/08 | 98/09-A | 98/09-B | 109/10 | 120/10 | 69/10 | 178/09 | 48/10-10 | 20/11-21 | 20/11-29 | 342/09-466 | 128/11 | 123/11-800 | 45/10-8 | 328/11-55 | 322/09 | 45/10-6 | CB/05 | 450/07 | BGF10 | INSAVC | 03-3684 |
|---------------|---------|--------|---------|---------|--------|--------|-------|--------|----------|----------|----------|------------|--------|------------|---------|-----------|--------|---------|-------|--------|-------|--------|---------|
| 185/08-IT     | P       |        | 98.5    | 97.8    | 93.4   | 98.5   | 99.2  | 98.5   | 96.3     | 96.3     | 97.1     | 96.3       | 97.1   | 95.6       | 97.1    | 96.3      | 77.5   | 78.9    | 94.9  | 94.9   | 76.8  | 78.9   | 79.7    |
| 98/09-A-IT    | P       | 98.5   |         | 99.2    | 93.4   | 97.1   | 97.8  | 97.1   | 95.6     | 96.3     | 97.1     | 96.3       | 97.1   | 95.6       | 95.6    | 96.3      | 77.5   | 78.9    | 94.9  | 94.9   | 76    | 78.2   | 78.2    |
| 98/09-B-IT    | P       | 98.3   | 99.7    |         | 92.7   | 96.3   | 97.1  | 96.3   | 94.9     | 95.6     | 96.3     | 95.6       | 96.3   | 94.9       | 94.9    | 95.6      | 76.8   | 78.2    | 94.2  | 94.2   | 76    | 77.5   | 77.5    |
| 109/10-IT     | P       | 93.7   | 93.2    | 92.9    |        | 92     | 92.7  | 92.7   | 91.3     | 92       | 92.7     | 92         | 92.7   | 97.1       | 90.5    | 92        | 76.8   | 78.2    | 96.3  | 96.3   | 76    | 78.2   | 78.9    |
| 120/10-IT     | P       | 99     | 97.5    | 97.3    | 92.7   |        | 97.8  | 97.1   | 94.9     | 94.9     | 95.6     | 94.9       | 95.6   | 94.2       | 95.6    | 94.9      | 76.8   | 78.2    | 93.4  | 93.4   | 76    | 78.2   | 78.9    |
| 69/10-IT      | P       | 99.7   | 98.3    | 98      | 93.4   | 98.7   |       | 97.8   | 95.6     | 95.6     | 96.3     | 95.6       | 96.3   | 94.9       | 96.3    | 95.6      | 76.8   | 78.2    | 94.2  | 94.2   | 76    | 78.2   | 78.9    |
| 178/09-EL     | P       | 99     | 97.5    | 97.3    | 93.2   | 98     | 98.7  |        | 95.6     | 96.3     | 97.1     | 96.3       | 97.1   | 94.2       | 95.6    | 96.3      | 76.8   | 78.2    | 94.2  | 93.4   | 76.8  | 78.9   | 78.9    |
| 48/10-10-NL   | P       | 97.8   | 97.1    | 96.8    | 92.2   | 97.3   | 97.5  | 96.8   |          | 95.6     | 96.3     | 95.6       | 96.3   | 92         | 93.4    | 95.6      | 75.3   | 76.8    | 91.3  | 91.3   | 74.6  | 78.2   | 78.2    |
| 20/11-21-NL   | P       | 97.8   | 97.3    | 97.1    | 92.5   | 97.1   | 97.5  | 97.3   | 96.3     |          | 99.2     | 100        | 99.2   | 93.4       | 93.4    | 100       | 74.6   | 76      | 92.7  | 92.7   | 75.3  | 76.8   | 77.5    |
| 20/11-29-BE   | P       | 97.8   | 97.8    | 97.5    | 92.5   | 97.1   | 97.5  | 97.3   | 96.3     | 99.5     |          | 99.2       | 100    | 94.2       | 94.2    | 99.2      | 75.3   | 76.8    | 93.4  | 93.4   | 76    | 77.5   | 78.2    |
| 342/09-466-HU | P       | 97.8   | 97.3    | 97.1    | 92.5   | 97.1   | 97.5  | 97.3   | 96.3     | 100      | 99.5     |            | 99.2   | 93.4       | 93.4    | 100       | 74.6   | 76      | 92.7  | 92.7   | 75.3  | 76.8   | 77.5    |
| 128/11-HU     | P       | 98     | 97.5    | 97.3    | 92.7   | 97.3   | 97.8  | 97.5   | 96.6     | 99.7     | 99.7     | 99.7       |        | 94.2       | 94.2    | 99.2      | 75.3   | 76.8    | 93.4  | 93.4   | 76    | 77.5   | 78.2    |
| 123/11-800-HU | P       | 95.8   | 95.8    | 95.6    | 95.1   | 95.1   | 95.6  | 94.9   | 94.4     | 95.4     | 95.4     | 95.4       | 95.6   |            | 92.7    | 93.4      | 76.8   | 78.2    | 99.2  | 99.2   | 76.8  | 77.5   | 78.2    |
| 45/10-8-FR    | P       | 97.8   | 97.3    | 97.1    | 92     | 96.8   | 97.5  | 96.8   | 96.1     | 96.1     | 96.1     | 96.1       | 96.3   | 94.6       |         | 93.4      | 75.3   | 76.8    | 92    | 92     | 73.9  | 76.8   | 76.8    |
| 328/11-55-FR  | P       | 97.8   | 97.3    | 97.1    | 92.5   | 97.1   | 97.5  | 97.3   | 96.3     | 100      | 99.5     | 100        | 99.7   | 95.4       | 96.1    |           | 74.6   | 76      | 92.7  | 92.7   | 75.3  | 76.8   | 77.5    |
| 322/09-FR     | P       | 78.7   | 79.2    | 78.9    | 79.4   | 78.5   | 78.5  | 78.2   | 77.7     | 77.7     | 77.7     | 77.7       | 78     | 79.2       | 78      | 77.7      |        | 94.1    | 77.5  | 76.8   | 83.2  | 87.5   | 85.4    |
| 45/10-6-FR    | P       | 79.2   | 79.7    | 79.4    | 79.4   | 78.9   | 78.9  | 78.5   | 78.2     | 78       | 78       | 78         | 78.2   | 79.9       | 78.5    | 78        | 97.3   |         | 78.2  | 77.5   | 86.8  | 90.5   | 85.4    |
| CB/05-IT      | P       | 96.8   | 97.3    | 97.1    | 94.4   | 95.8   | 96.6  | 96.3   | 95.1     | 95.6     | 96.1     | 95.6       | 95.8   | 97.1       | 95.6    | 95.6      | 78.2   | 78.5    |       | 98.5   | 76.8  | 77.5   | 77.5    |
| 450/07-IT     | P       | 97.1   | 97.5    | 97.3    | 94.6   | 96.1   | 96.8  | 96.1   | 95.4     | 95.8     | 96.3     | 95.8       | 96.1   | 97.3       | 95.8    | 95.8      | 78     | 78.5    | 99.2  |        | 76    | 76.8   | 77.5    |
| BGF10-ES      | E       | 76.5   | 76.3    | 76      | 77     | 75.8   | 76.3  | 76     | 75.8     | 75.6     | 75.6     | 75.6       | 75.8   | 76.3       | 75.6    | 75.6      | 85.6   | 86.8    | 75.8  | 76     |       | 87.5   | 81      |
| INSAVC-US     | E       | 78.7   | 78.5    | 78.2    | 79.2   | 78.5   | 78.5  | 78.9   | 79.4     | 77.5     | 77.5     | 77.5       | 77.7   | 78.7       | 77.7    | 77.5      | 88.8   | 89.5    | 78.2  | 78     | 88.8  |        | 86.8    |
| 03-3684-IR    | E       | 79.4   | 78.9    | 78.7    | 79.7   | 78.7   | 79.2  | 78.7   | 78.2     | 78.2     | 78.2     | 78.2       | 78.5   | 79.2       | 78.2    | 78.2      | 90     | 90.2    | 78.5  | 78.7   | 85.6  | 90     |         |

IT, Italy; EL, Greece; NL, the Netherlands; BE, Belgium; HU, Hungary; FR, France; ES, Spain; US, United States; IR, Ireland; P, pantropic; E, enteric.
